# Supplementary material for: Tweaking the electrocatalytic ability of Cu-MOF by the inclusion of PTA: a selective electrochemical sensor for resorcinol
Source: Royal Society of Chemistry journal article supplement (doi:10.1039/d3ma01027a), 2024-01-01
Supplement: d3ma01027a1.pdf [file d3ma01027a1.pdf]

## Tweaking electrocatalytic ability of Cu-MOF by the inclusion of PTA: A selective electrochemical sensor for Resorcinol

Sandra Jose<sup>a</sup>, Munmun Ghosh<sup>b</sup>, Anitha Varghese<sup>a\*</sup>

<sup>a</sup>Department of Chemistry, CHRIST (Deemed to Be University), Bengaluru 560029, India.

<sup>b</sup> Department of Chemistry, Ashoka University, Haryana 131029, India

\*Corresponding author Email address: [anitha.varghese@christuniversity.in](mailto:anitha.varghese@christuniversity.in) (Anitha Varghese)

### Supplementary Information

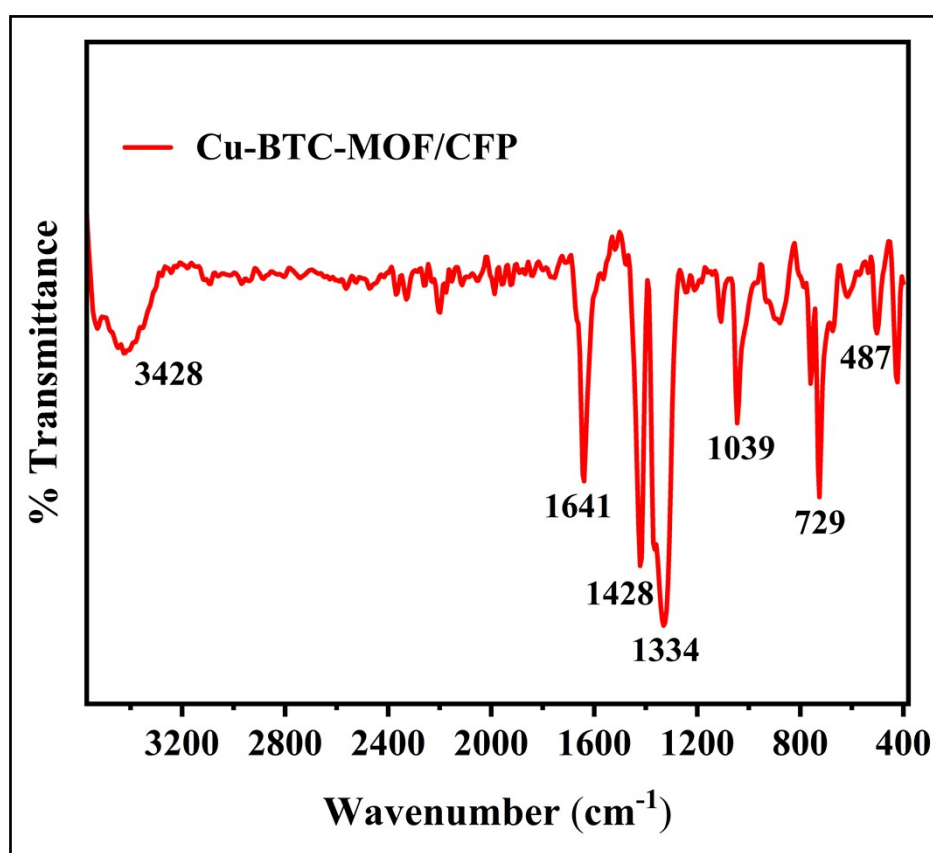

Fig. S1. FTIR spectrum of Cu-BTC-MOF/CFP electrode.

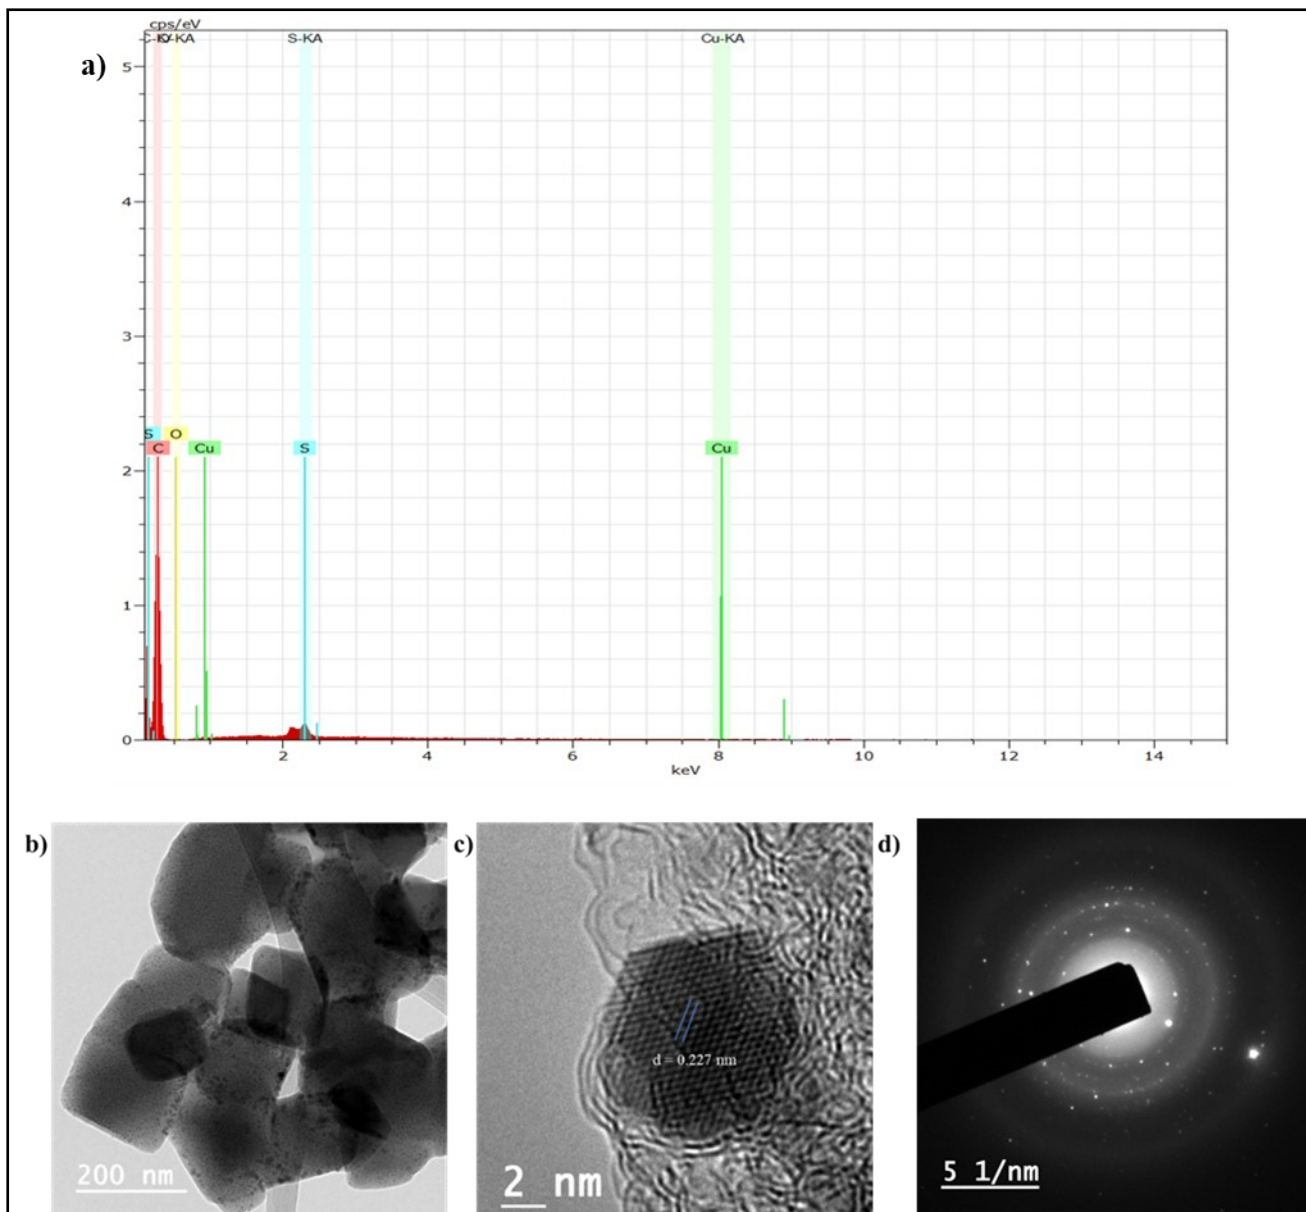

**Fig. S2.** a) EDS spectra of Cu-BTC-MOF/PTA/CFP b) and c) HRTEM images of Cu-BTC-MOF/CFP d) SAED pattern of Cu-BTC-MOF/CFP.

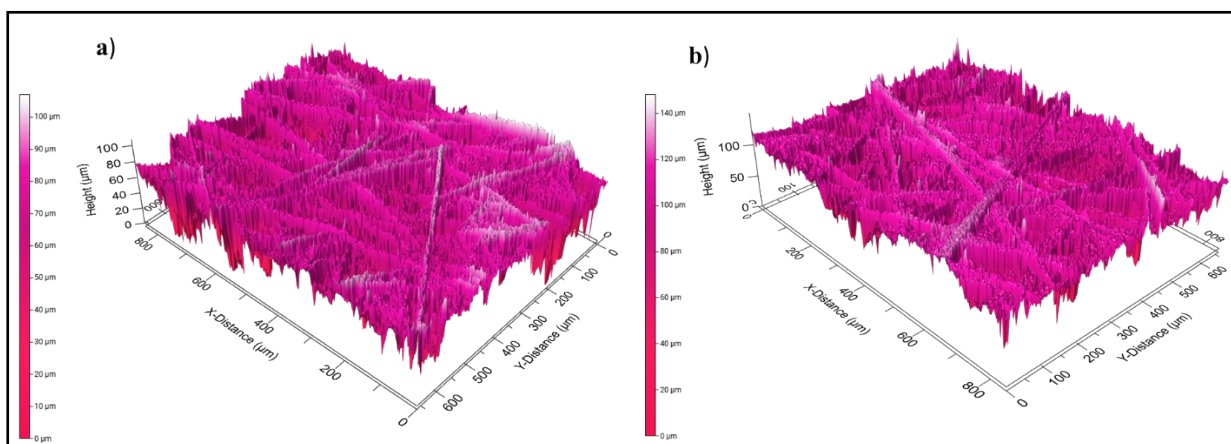

**Fig. S3.** 3 D Optical profilometric images of PTA/CFP electrode (a), Cu-BTC-MOF/PTA/CFP (b).

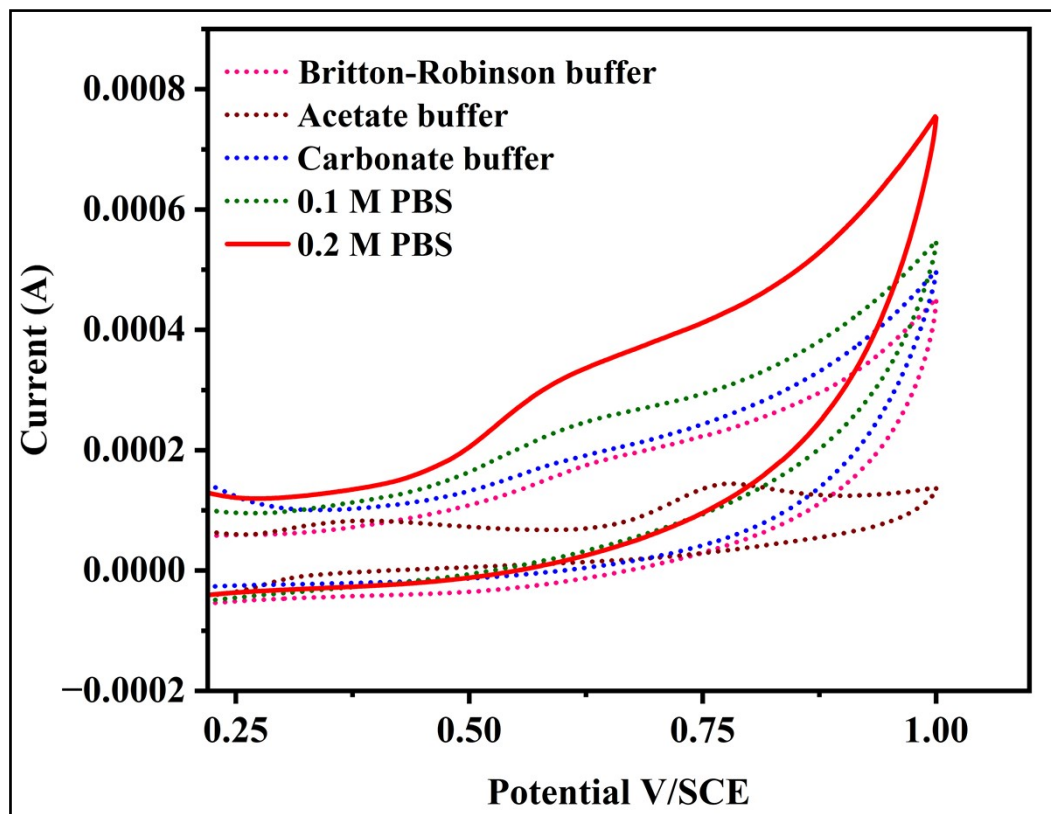

**Fig. S4.** CVs of Cu-BTC-MOF/PTA/CFP electrode in various buffer solutions in the presence of 120 nM RL.

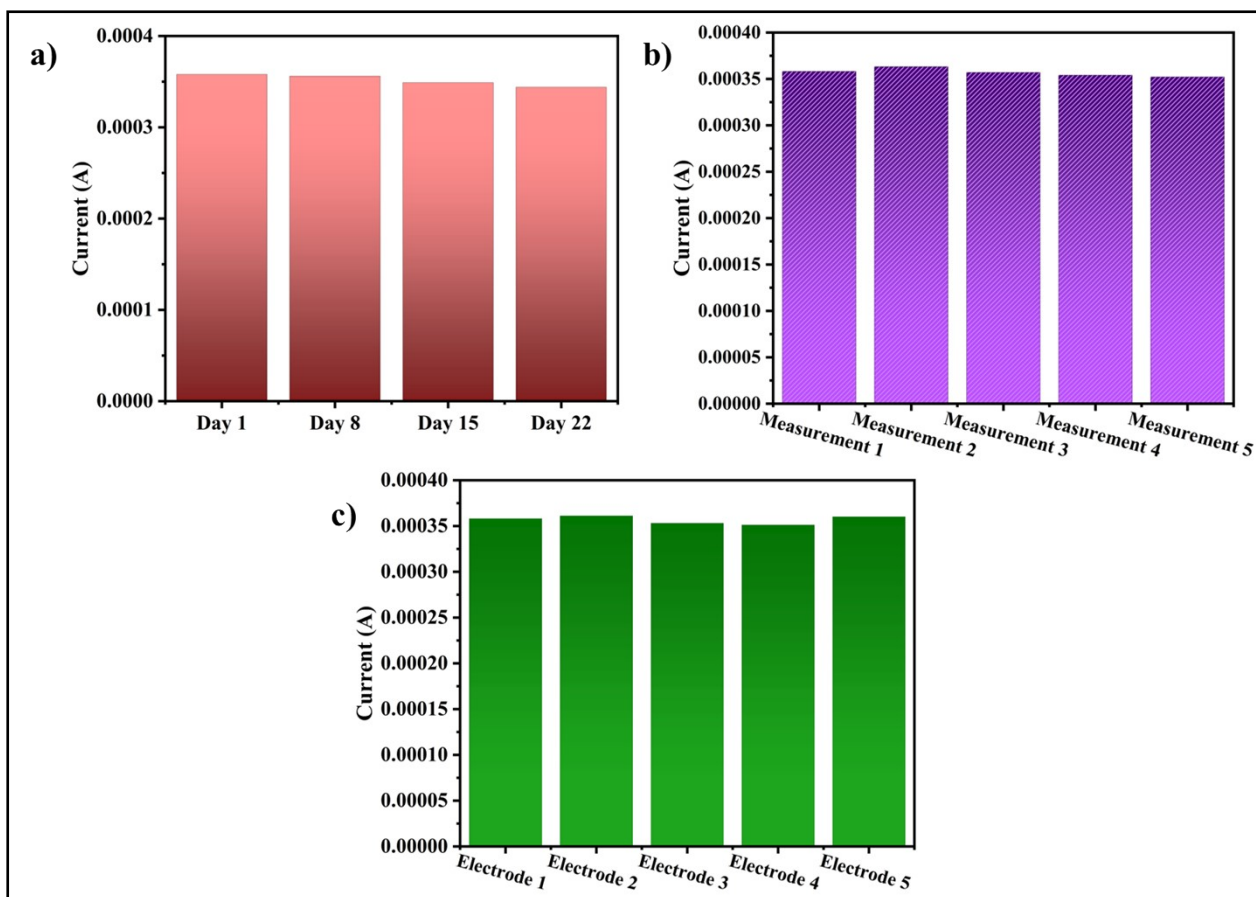

**Fig. S5.** a) Stability studies b) repeatability studies c) reproducibility studies of Cu-BTC-MOF/PTA/CFP in 0.2 M PBS (pH 7) containing 120 nM RL.
